# Supplementary figures and images for: Bacterial Composition and Interactions in Raw Milk and Teat Skin of Dairy Cows
Source: MDPI journal article supplement (doi:10.3390/fermentation8050235), 2022-05-18

$r = 0.305, P = 0.001$

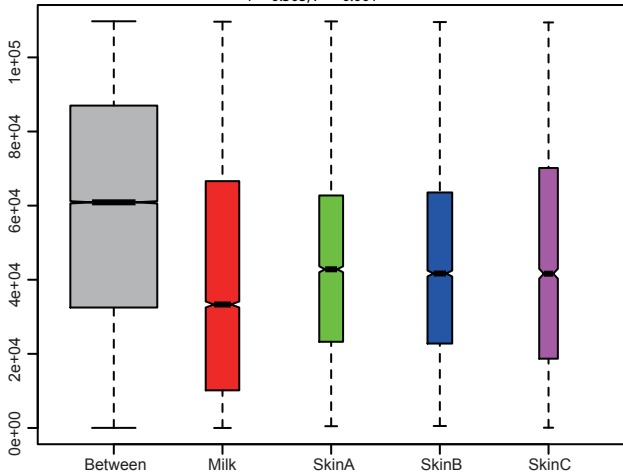

Supplement: s1 [file s1]

**a**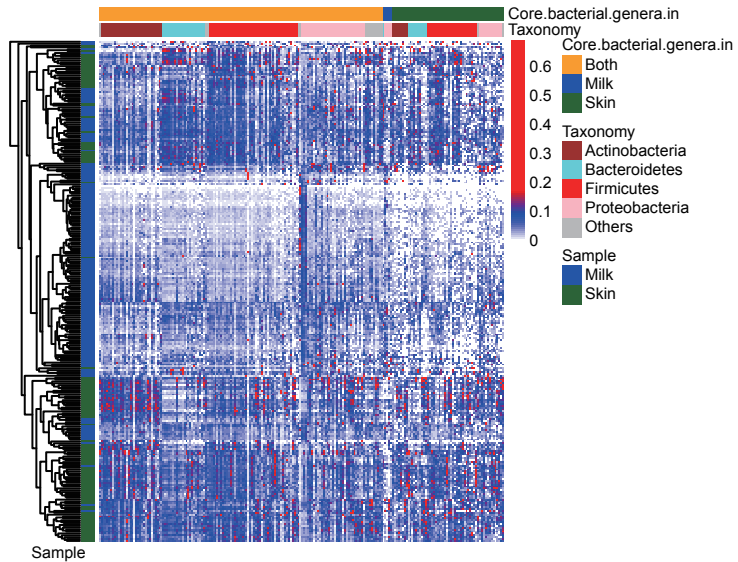**b**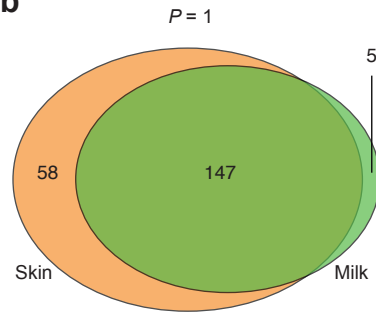

Supplement: s1 [file s1]

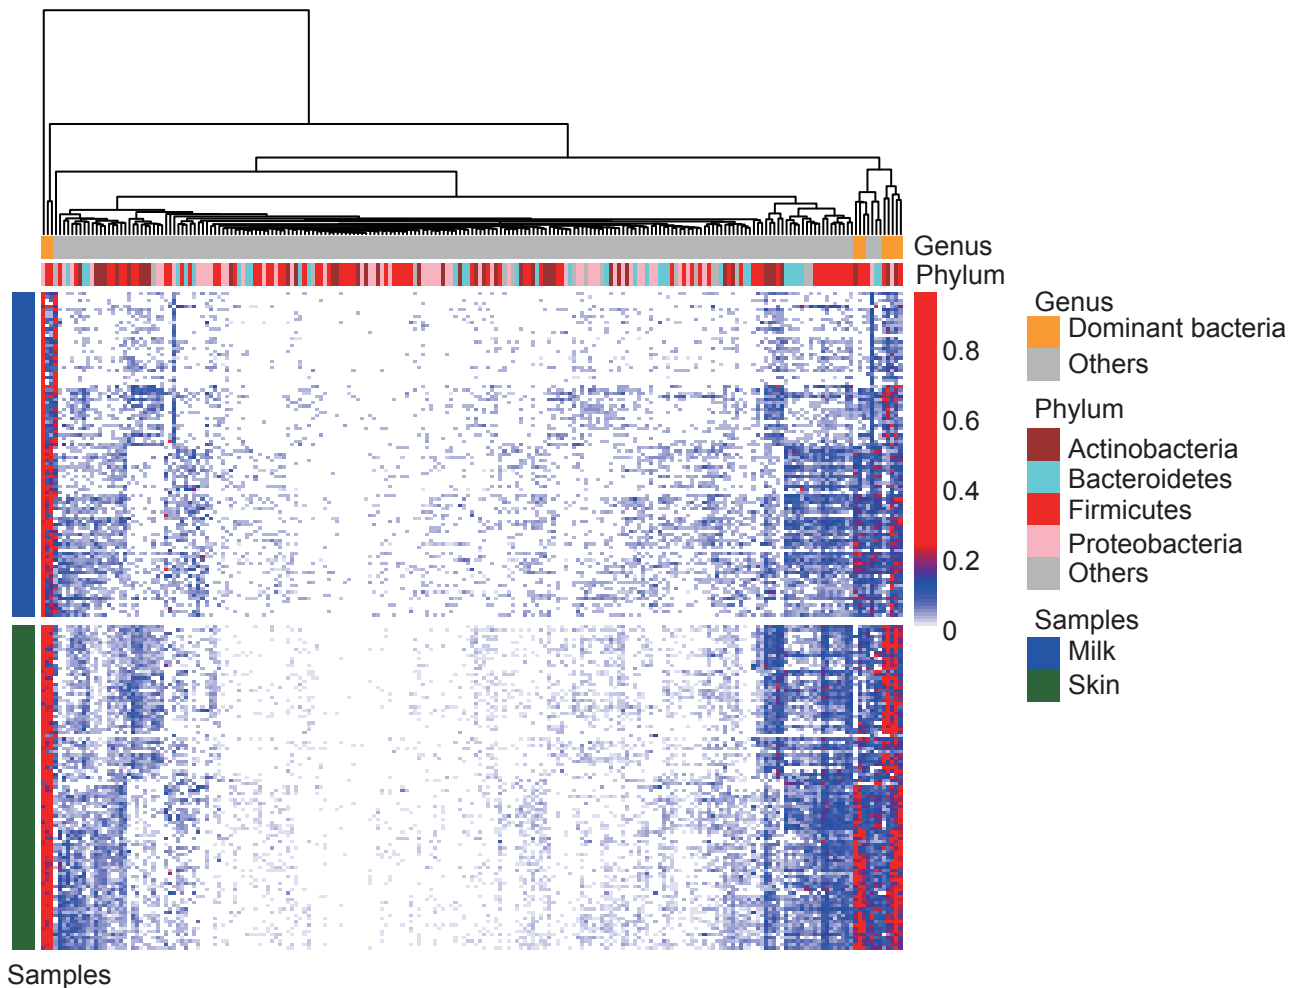

Supplement: s1 [file s1]
